# Supplementary material for: A tiny viral protein, SARS-CoV-2-ORF7b: Functional molecular mechanisms.
Source: Preprints.org preprint supplement (doi:10.20944/preprints202403.0473.v1), 2024-03-08
Supplement: Supplementary file 2 [file supplementary]

Archive with 1 entries (1 files):
- Biomolecules SUPPLEMENTS Colonna G et al.pdf
